# Supplementary figures and images for: First 3D-printed complex inorganic polycrystalline scintillator
Source: Royal Society of Chemistry journal article supplement (doi:10.1039/c7ce00541e), 2017-01-01

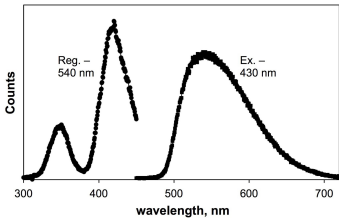

Supplement: c7ce00541e1.pdf [file c7ce00541e1.pdf]
